# Supplementary material for: Sensors for Highly Toxic Gases: Methylamine and Hydrogen Chloride Detection at Low Concentrations in an Ionic Liquid on Pt Screen Printed Electrodes
Source: MDPI journal article supplement (doi:10.3390/s151026866), 2015-10-22
Supplement: s1 [file s1]

*Supplementary Information***Sensors for Highly Toxic Gases: Methylamine and Hydrogen Chloride Detection at Low Concentrations in an Ionic Liquid on Pt Screen Printed Electrodes. *Sensors* 2015, 15, 26866-26876****Krishnan Murugappan <sup>†</sup> and Debbie S. Silvester <sup>\*</sup>**

Nanochemistry Research Institute, Department of Chemistry, Curtin University, GPO Box U1987, Perth 6845, WA, Australia; E-Mail: d.silvester-dean@curtin.edu.au

<sup>†</sup> Present address: Department of Materials, Parks Rd, Oxford OX1-3PH, UK.

<sup>\*</sup> Author to whom correspondence should be addressed; E-Mail: d.silvester-dean@curtin.edu.au; Tel.: +61-8-9266-7148; Fax: +61-8-9266-2300.

---

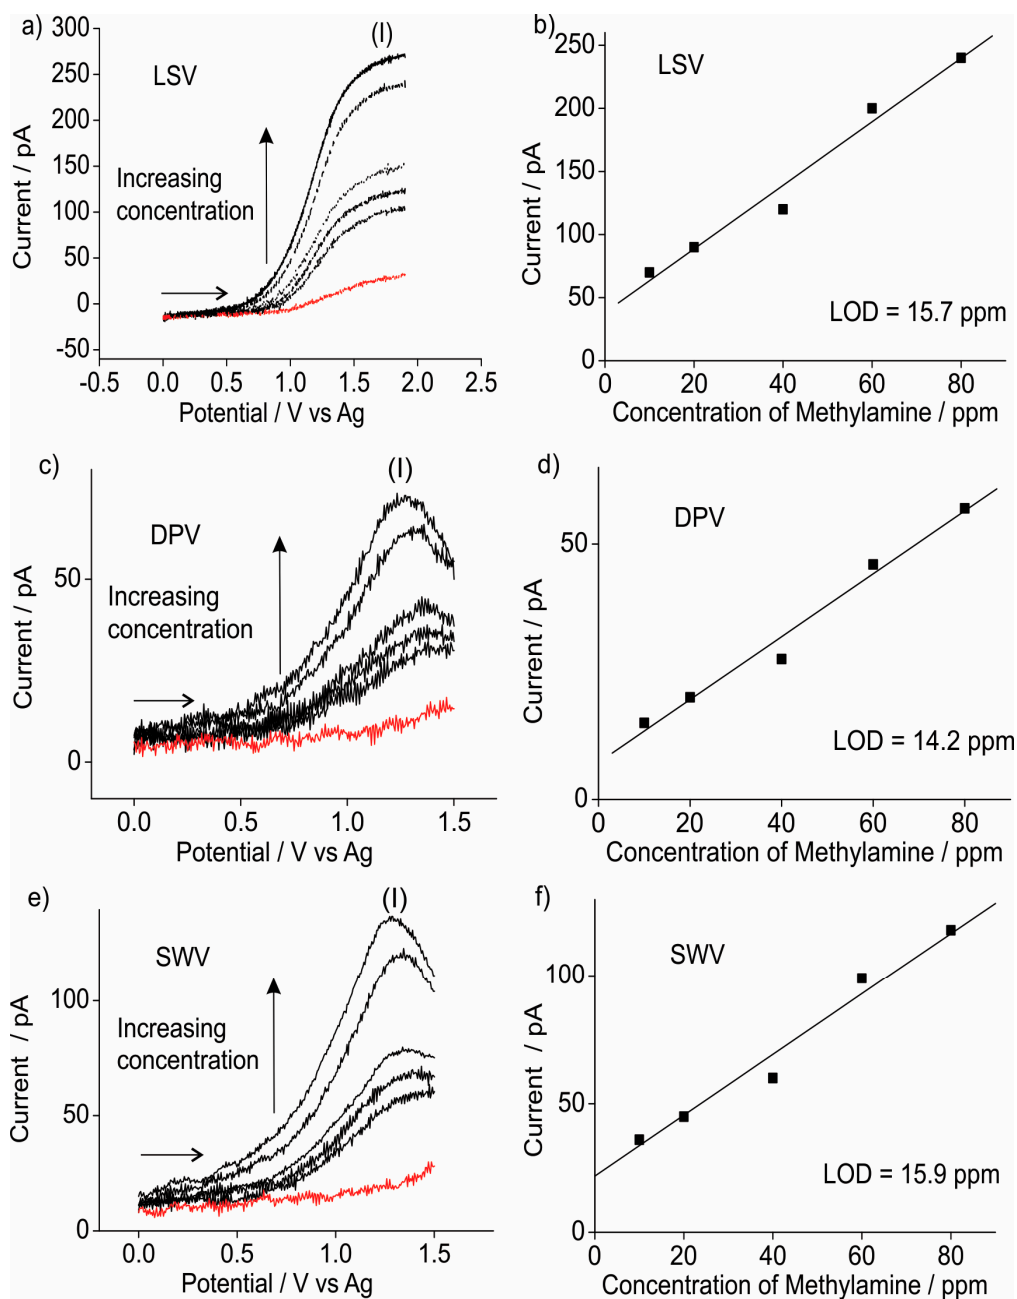

**Figure S1.** (a) LSV, (c) DPV and (e) SWV for the oxidation of methylamine gas (10, 20, 40, 60 and 80 ppm in the gas phase) on a Pt microelectrode (radius 8.3  $\mu\text{m}$ ) in  $[\text{C}_2\text{mim}][\text{NTf}_2]$ . Dashed line is the response in the absence of methylamine gas. Calibration plot obtained for (b) LSV, (d) DPV and (f) SWV using the peak currents from (a,c,e).

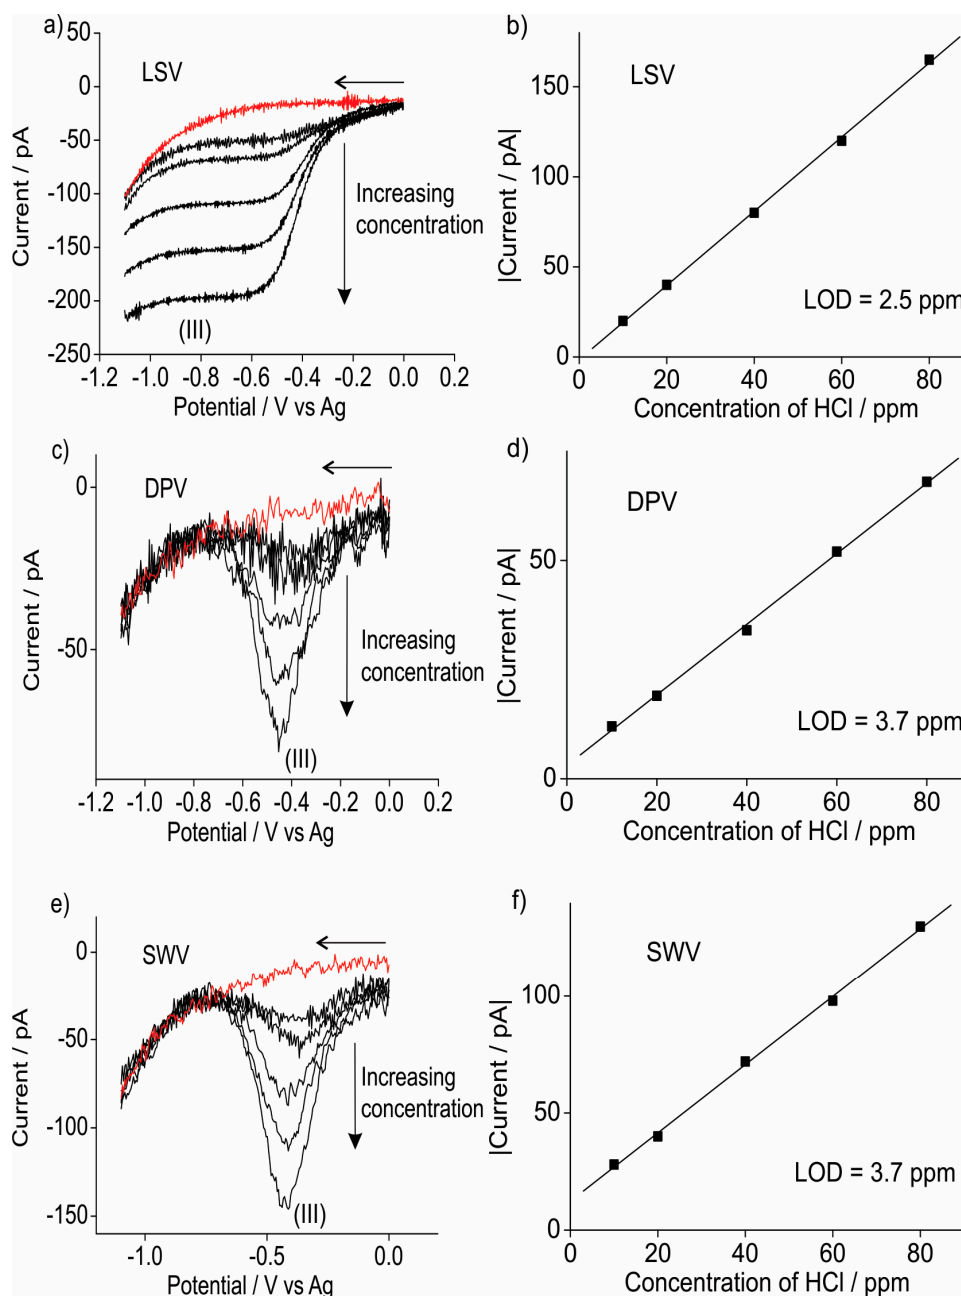

**Figure S2.** (a) LSV, (c) DPV and (e) SWV for the reduction of protons (10, 20, 40, 60 and 80 ppm in the gas phase) on a Pt microelectrode (radius 8.3  $\mu\text{m}$ ) in  $[\text{C}_2\text{mim}][\text{NTf}_2]$ . Dashed line is the response in the absence of hydrogen chloride gas. Calibration plot obtained for (b) LSV, (d) DPV and (f) SWV using the peak currents from (a,c,e).
